# Supplementary material for: Elevated STIL predicts poor prognosis in patients with hepatocellular carcinoma
Source: Research Square preprint supplement (doi:10.21203/rs.3.rs-955343/v1), 2021-10-11
Supplement: Supplementary file 1 [file c889a06086353f517e1c603f.xlsx]

## Sheet: Sheet1
group	STIL
Normal	5.27798
Normal	4.93688
Normal	5.54568
Normal	7.07029
Normal	5.89168
Normal	5.24302
Normal	5.6677
Normal	5.98191
Normal	5.57917
Normal	5.30224
Normal	5.39773
Normal	5.80169
Normal	5.29907
Normal	5.60731
Normal	5.78674
Normal	5.4516
Normal	5.34775
Normal	5.93912
Normal	5.66531
Normal	4.94766
Normal	5.51637
Normal	5.61054
Normal	5.02962
Normal	5.59758
Normal	5.80976
Normal	5.62689
Normal	5.00132
Normal	4.77847
Normal	5.24546
Normal	4.7551
Normal	5.3186
Normal	5.19102
Normal	4.95142
Normal	6.00412
Normal	5.00017
Normal	5.23909
Normal	5.20182
Tumor	6.32901
Tumor	6.25658
Tumor	7.31327
Tumor	6.51215
Tumor	6.36132
Tumor	6.22875
Tumor	7.84867
Tumor	6.56027
Tumor	5.58938
Tumor	7.72276
Tumor	6.84734
Tumor	6.66012
Tumor	7.0834
Tumor	5.84058
Tumor	5.40724
Tumor	5.5838
Tumor	7.25193
Tumor	6.24728
Tumor	6.09557
Tumor	5.7945
Tumor	6.40777
Tumor	5.62342
Tumor	7.75268
Tumor	6.51594
Tumor	6.48669
Tumor	6.24079
Tumor	5.68891
Tumor	6.2269
Tumor	7.13871
Tumor	6.57094
Tumor	7.03958
Tumor	7.53384
Tumor	5.99384
Tumor	5.3173
Tumor	7.6436
Tumor	5.88699
Tumor	7.67701
Tumor	5.90838
Tumor	7.00591
Tumor	5.40247
Tumor	6.36688
Tumor	7.05429
Tumor	6.42443
Tumor	5.61608
Tumor	6.10717
Tumor	7.05253
Tumor	7.45028
Tumor	6.54271
Tumor	5.30163
Tumor	6.37488
Tumor	6.92188
Tumor	7.50285
Tumor	7.67232
Tumor	6.12915
Tumor	7.00038
Tumor	6.6375
Tumor	6.12636
Tumor	6.27733
Tumor	7.01488
Tumor	6.39296
Tumor	8.44452
Tumor	6.69528
Tumor	6.47907
Tumor	7.12414
Tumor	6.9828
Tumor	6.72143
Tumor	6.12544
Tumor	7.71978
Tumor	7.16112
Tumor	5.30443
